# Supplementary material for: Unusually large hyperfine structure of the electron spin levels in an endohedral dimetallofullerene and its spin coherent properties
Source: Royal Society of Chemistry journal article supplement (doi:10.1039/d0nr06114j), 2020-01-01
Supplement: d0nr06114j1.pdf [file d0nr06114j1.pdf]

Supplementary Information

**Unusually large hyperfine structure of the electron spin  
levels in an endohedral dimetallofullerene and its spin  
coherent properties**

Ruslan B. Zaripov,<sup>1</sup> Yuri E. Kandrashkin,<sup>1</sup> Kev M. Salikhov<sup>1</sup>, Bernd Büchner<sup>2,3</sup>, Fupin Liu,<sup>2</sup>

Marco Rosenkranz,<sup>2</sup> Alexey A. Popov<sup>2</sup> and Vladislav Kataev<sup>2</sup>

<sup>1</sup>Zavoisky Physical-Technical Institute, FRC Kazan Scientific Center of Russian Academy of  
Sciences, Kazan 420029, Russia

<sup>2</sup>Leibniz IFW Dresden, D-01069, Dresden, Germany

<sup>3</sup>Institute for Solid State and Materials Physics, TU Dresden, D-01062 Dresden, Germany

## **Synthesis and separation of Sc<sub>2</sub>@C<sub>80</sub>(CH<sub>2</sub>Ph)**

Sc<sub>2</sub>@C<sub>80</sub>(CH<sub>2</sub>Ph) was synthesized following the procedure developed by us previously.<sup>1, 2</sup> In brief, arc-discharge synthesis was performed in He atmosphere with graphite electrodes filled with a mixture of Sc<sub>2</sub>O<sub>3</sub> and graphite powder. The soot produced in the arc was extracted by boiling in DMF overnight, and the extract solution in DMF was then reacted with excess of benzyl bromide at elevated temperature. At this stage reaction gives a mixture of benzyl-adduct of Sc-EMFs soluble in toluene. This mixture was then separated by a three-step HPLC as presented in Figure S1. The mass spectra presented in Figure S2 confirm the purity of the isolated Sc<sub>2</sub>@C<sub>80</sub>(CH<sub>2</sub>Ph) compound. The similarity of the UV-vis-NIR absorption spectra of Sc<sub>2</sub>@C<sub>80</sub>(CH<sub>2</sub>Ph) and all other M<sub>2</sub>@C<sub>80</sub>(CH<sub>2</sub>Ph) compounds characterized earlier proves that they have the same molecular structure (Figure S3, the spectrum of Tb<sub>2</sub>@C<sub>80</sub>(CH<sub>2</sub>Ph) from Ref. 1 is used for comparison)

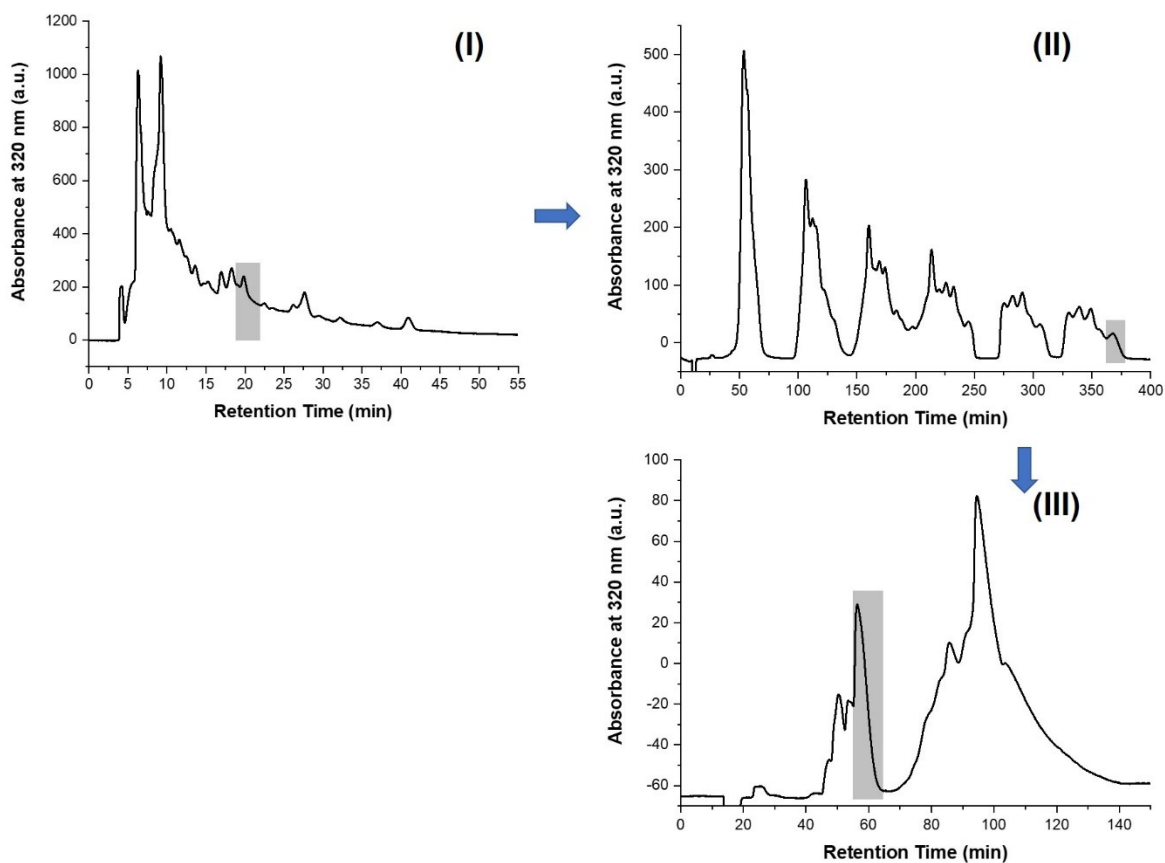

**Figure S1.** Separation of  $\text{Sc}_2@C_{80}(\text{CH}_2\text{Ph})$ . Three steps HPLC separation were required to obtain the pure compound. **(I)** HPLC profile of the mixture of benzyl-derivatized Sc-EMFs. The highlighted fraction contained  $\text{Sc}_2@C_{80}(\text{CH}_2\text{Ph})$  was collected for further separation. HPLC conditions: linear combination of two  $4.6 \times 250$  mm Buckyrep columns; flow rate 1.6 mL/min; injection volume  $800 \mu\text{L}$ ; toluene as eluent;  $40^\circ\text{C}$ . **(II)** Recycling HPLC separation of the fraction collected in the first step. The highlighted fraction was collected for further separation ( $10 \times 250$  mm Buckyrep column; flow rate 1.5 mL/min; injection volume 4.5 mL; toluene as eluent). **(III)** HPLC separation of the fraction collected in the second step. Pure  $\text{Sc}_2@C_{80}(\text{CH}_2\text{Ph})$  was obtained as the highlighted fraction. ( $10 \times 250$  mm Buckyrep-D column; flow rate 1.0 mL/min; injection volume 4.5 mL; toluene as eluent).

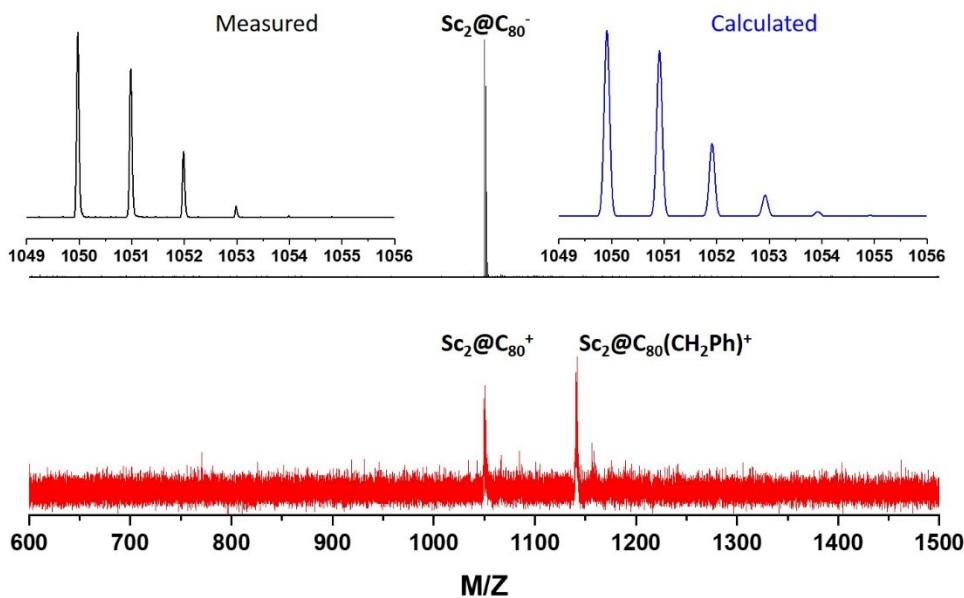

**Figure S2.** Matrix-assisted laser desorption/ionization time-of-flight (MALDI TOF) mass-spectra of  $\text{Sc}_2@\text{C}_{80}(\text{CH}_2\text{Ph})$ . Linear negative (top) and positive (bottom) ionization modes. Resolution in positive mode is not high enough for analysis of isotopic distribution. In the negative ion mode, strong fragmentation does not allow for detection of molecular peak, but spectral resolution is sufficient to prove correct isotopic distribution of the  $\text{Sc}_2@\text{C}_{80}^-$  fragment.

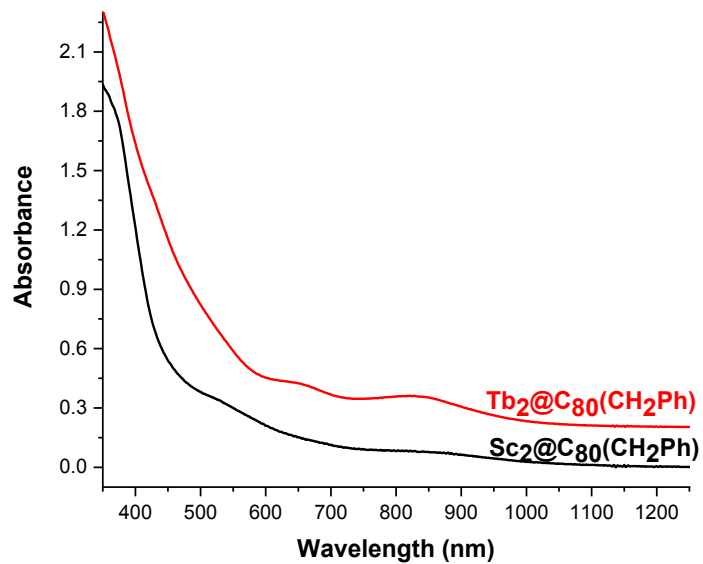

**Figure S3.** UV-vis-NIR absorption spectra of  $\text{Sc}_2@C_{80}(\text{CH}_2\text{Ph})$  in comparison with  $\text{Tb}_2@C_{80}(\text{CH}_2\text{Ph})$  (room temperature, toluene solution).

Simulation of the X-band EPR spectra of  $\text{Sc}_2@\text{C}_{80}(\text{CH}_2\text{Ph})$

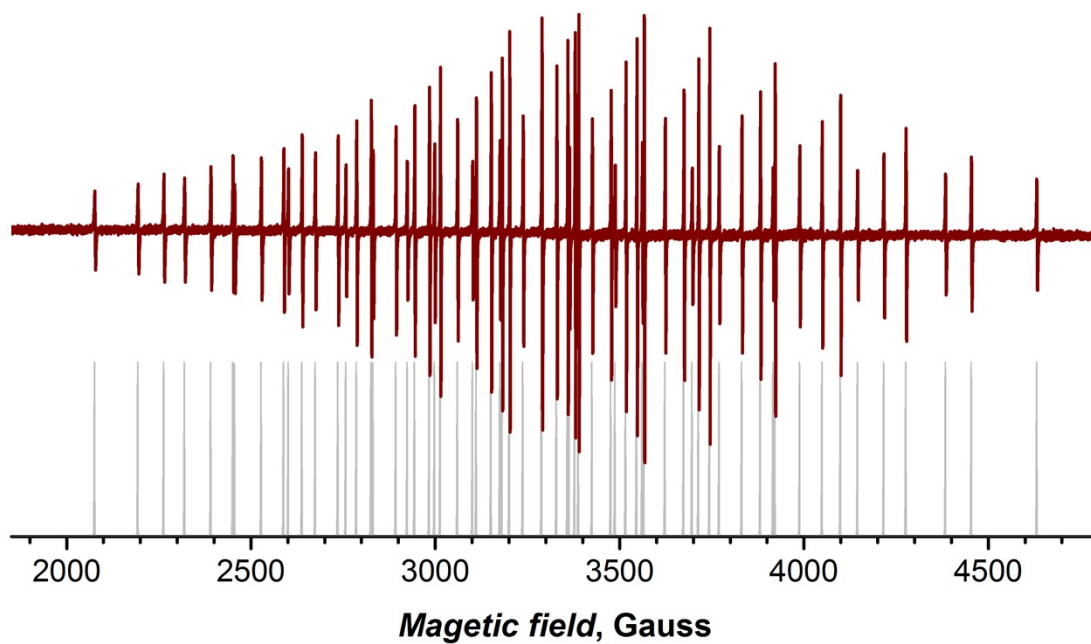

**Figure S4.** Experimental X-band spectrum of  $\text{Sc}_2@\text{C}_{80}(\text{CH}_2\text{Ph})$  measured in toluene at room temperature (top) is compared to the calculated position of the resonance transitions (gray vertical lines). The fit performed with EasySpin software<sup>3</sup> gives  $a_{\text{iso}}(^{45}\text{Sc}) = 509.5$  MHz,  $g_{\text{iso}} = 1.9955$

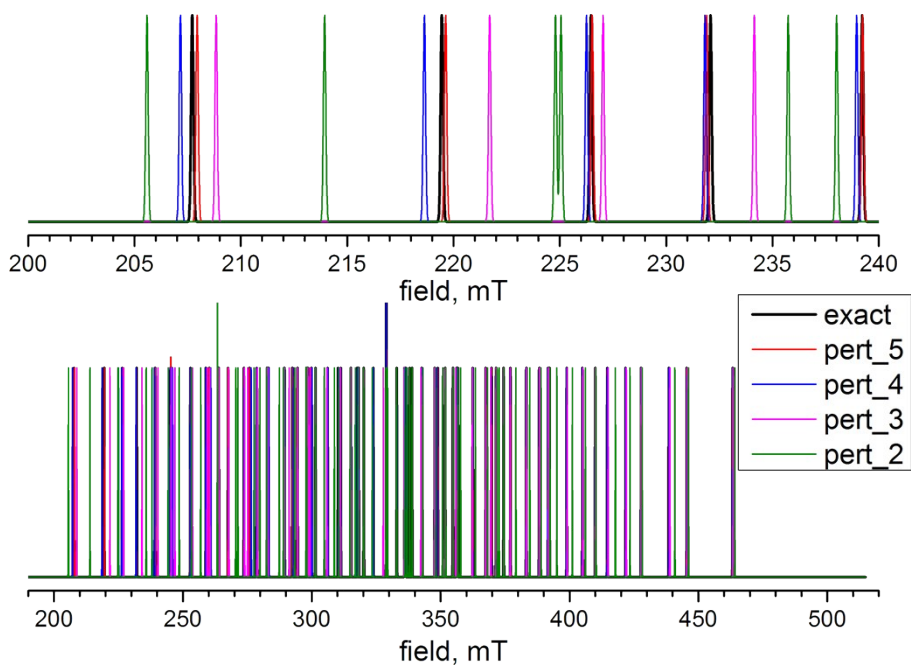

**Figure S5.** Calculated resonance position of  $\text{Sc}_2@C_{80}(\text{CH}_2\text{Ph})$  calculated with the “exact” algorithm (black lines) and with perturbation theory of 2<sup>nd</sup> to 5<sup>th</sup> order. The upper panel zooms in the low-field range

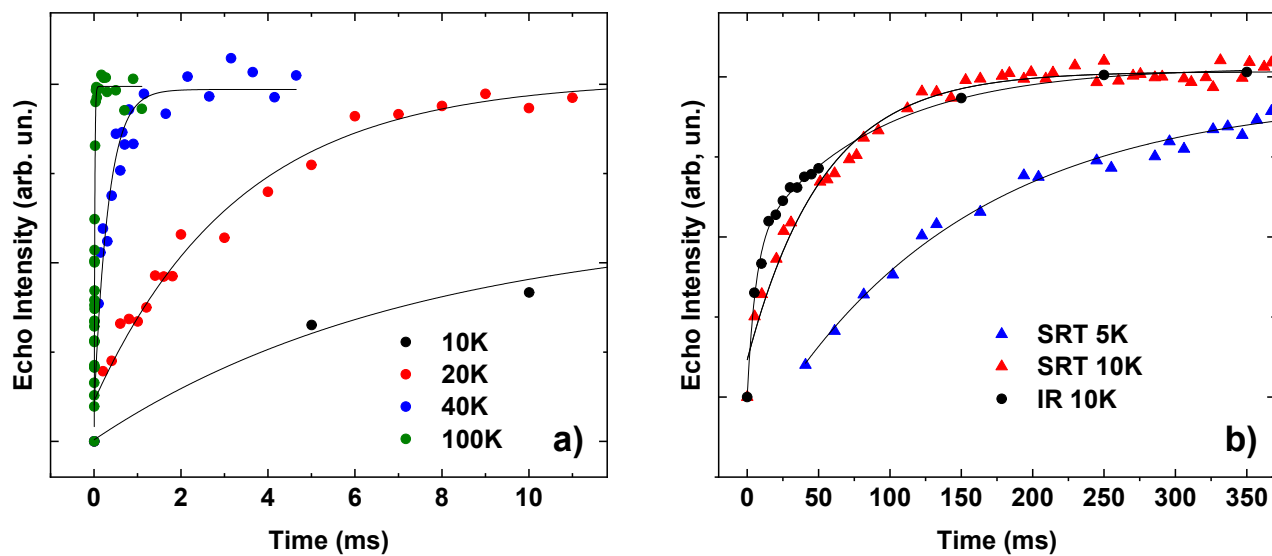

**Figure S6.** Examples of experimental time dependence of the electron spin echo intensity at different temperatures obtained with **(a)** - the inversion recovery (IR) protocol; **(b)** - the protocol of fast repetition of the pulse sequence with the variable shot repetition time (SRT). Here, the IR curve is added for comparison. As discussed in the main text, the IR protocol is less accurate at low temperatures<sup>4</sup>, which causes a discrepancy between the SRT and IR traces at  $T = 10$  K. Fits to experimental data in (a) and (b) are shown by solid lines.



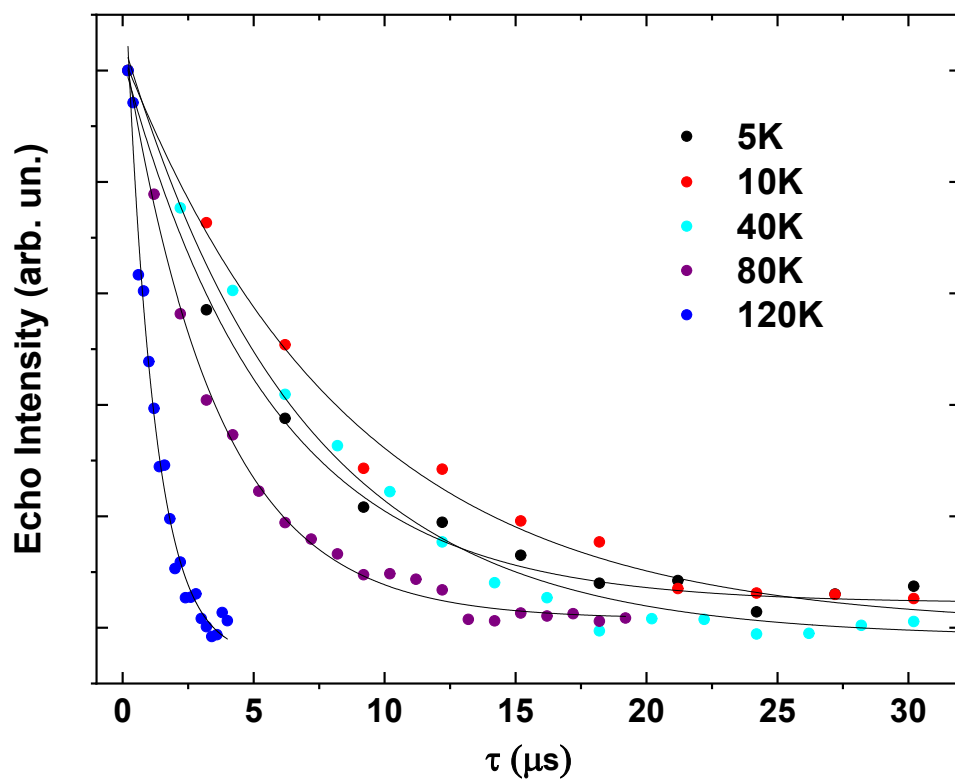

**Figure S7.** Experimental dependence of the electron spin echo intensity on the inter-pulse delay time  $\tau$  in the two pulse experiment at different temperatures. Solid lines are fits to experimental data.

**Table S1.** Phase memory  $T_m$  and longitudinal  $T_1^{IR}$  and  $T_1^{SRT}$  relaxation times at different temperatures. Labels IR and SRT correspond to the inversion recovery method and the protocol of fast repetition of the pulse sequence, respectively.

| Temperature, K | Relaxation times   |                         |                          |
|----------------|--------------------|-------------------------|--------------------------|
|                | $T_m, \mu\text{s}$ | $T_1^{IR}, \mu\text{s}$ | $T_1^{SRT}, \mu\text{s}$ |
| <b>5</b>       | 12.2±0.8           | -                       | 238814.7±23290.0         |
| <b>10</b>      | 17.0±1.3           | 32570.0±4664.6          | 51472.3±4153.3           |
| <b>20</b>      | 16.7±1.0           | 3570.3±356.7            | 5574.5±369.7             |
| <b>40</b>      | 13.5±0.8           | 296.4±44.3              | -                        |
| <b>60</b>      | 11.6±1.0           | 76.5±8.5                | -                        |
| <b>80</b>      | 7.1±0.3            | 40.0±6.5                | -                        |
| <b>100</b>     | 2.7±0.1            | 12.8±1.3                | -                        |
| <b>120</b>     | 2.2±0.2            | 26.0±10.7               | -                        |

## Reference

1. F. Liu, G. Velkos, D. S. Krylov, L. Spree, M. Zalibera, R. Ray, N. A. Samoylova, C.-H. Chen, M. Rosenkranz, S. Schiemenz, F. Ziegls, K. Nenkov, A. Kostanyan, T. Greber, A. U. B. Wolter, M. Richter, B. Büchner, S. M. Avdoshenko and A. A. Popov, *Nat. Commun.*, 2019, **10**, 571.
2. F. Liu, D. S. Krylov, L. Spree, S. M. Avdoshenko, N. A. Samoylova, M. Rosenkranz, A. Kostanyan, T. Greber, A. U. B. Wolter, B. Büchner and A. A. Popov, *Nat. Commun.*, 2017, **8**, 16098.
3. S. Stoll and A. Schweiger, *J. Magn. Reson.*, 2006, **178**, 42-55.
4. A. Schweiger and G. Jeschke, *Principles of Pulse Electron Paramagnetic Resonance*, Oxford University Press, 2001.
